# Supplementary material for: Controlled surface functionality of magnetic nanoparticles by layer-by-layer assembled nano-films
Source: Royal Society of Chemistry journal article supplement (doi:10.1039/c4nr07373h), 2015-01-01
Supplement: c4nr07373h1.pdf [file c4nr07373h1.pdf]

## Supporting Information

### Controlled Surface Functionality of Magnetic Nanoparticles by Layer-by-Layer

#### Assembled Nano-Films

*Daheui Choi, Boram Son, Tai Hyun Park, and Jinkee Hong\**

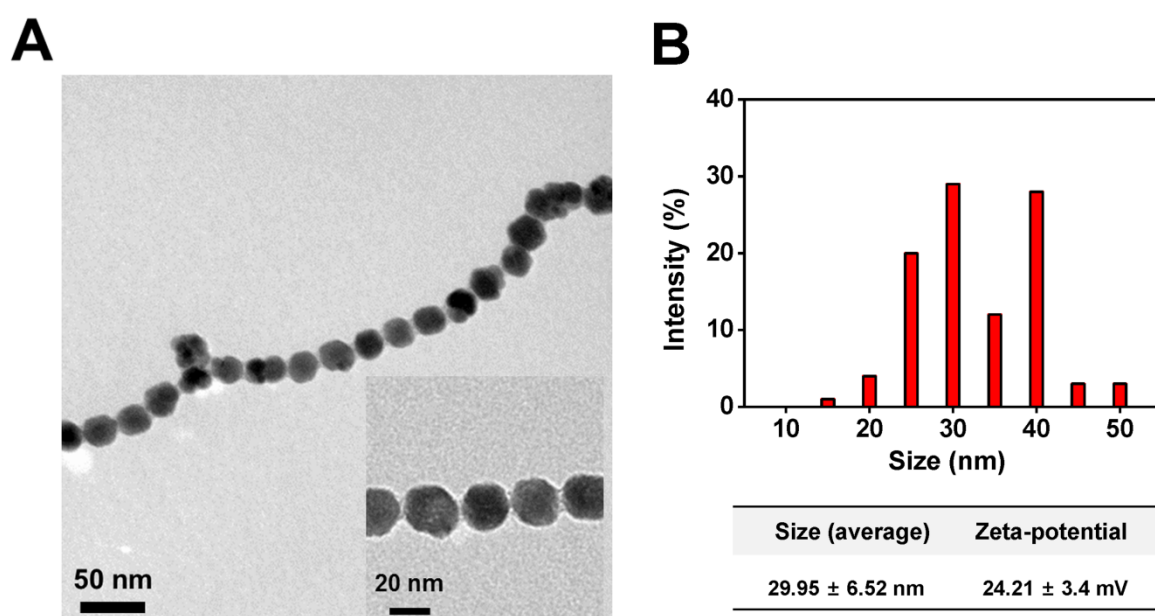

**Figure S1.** (A) EF-TEM images on MNPs. Inset image is highly magnified MNPs. (B) Top: Size distribution analysis on MNPs obtained from TEM results ( $n = 100$ ). Bottom: Size average and zeta-potential results on MNPs. The size average was calculated from TEM measurement data.

**A**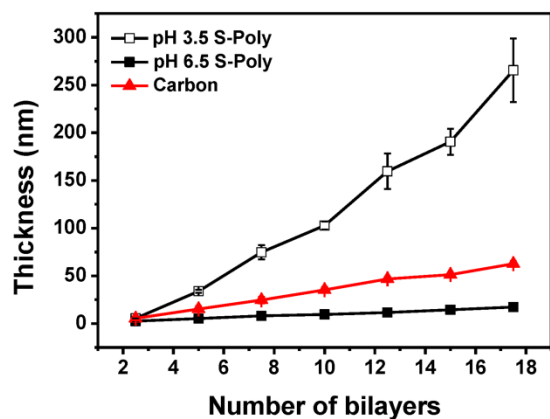**B**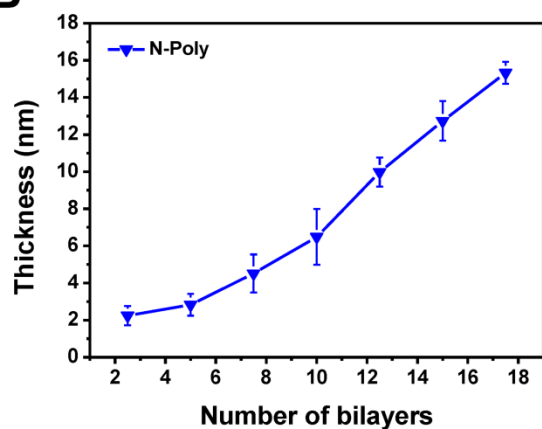

**Figure S2.** (A) Thickness curves on S-Poly and Carbon films onto flat substrate (silicon wafer) : pH 6.5 S-Poly film (■, black line), pH 3.5 S-Poly film (□, black dash line) and pH 3.5 Carbon film (▲, red line). (B) Thickness curve on N-Polys on wafers.

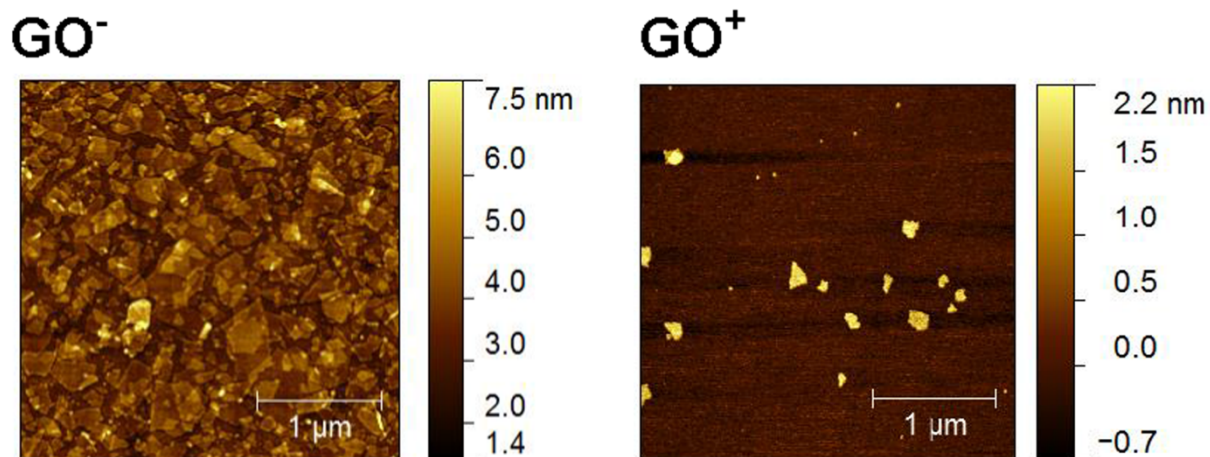

**Figure S3.** AFM images on  $\text{GO}^-$  and  $\text{GO}^+$ . The scale bar is  $1\ \mu\text{m}$ .

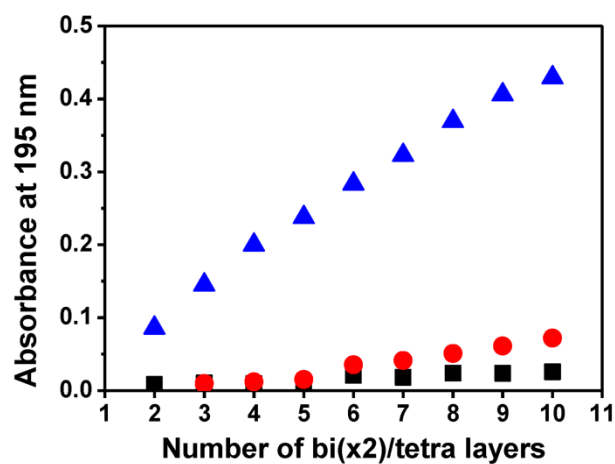

**Figure S4.** The absorbance at 195 nm via UV-visble measurement *verse* the number of bi/tetra layers of bFGF-loaded films on flat substrate: G1 (■, black; bilayer), G2 10 tetralayer (●, red; tetralayer) and G3 (▲, blue; tetralayer) films on quartz glass.

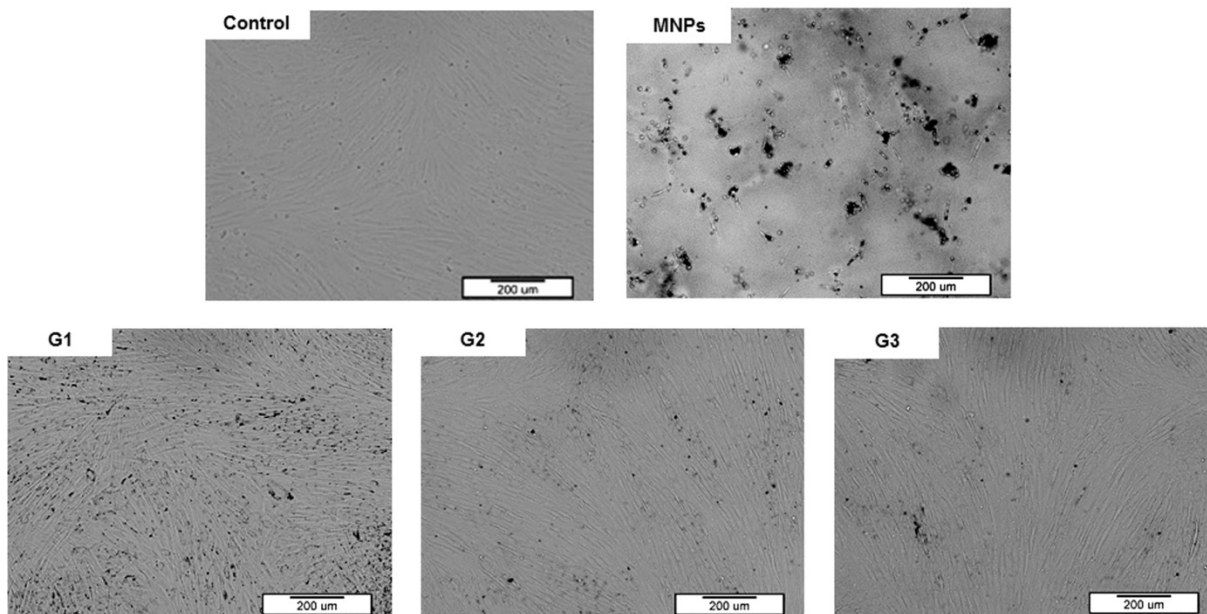

**Figure S5.** Microscope images of at the 6 day after treating MNPs and bFGF-loaded F-MNPs on hDF. The treated amounts of MNPs and bFGF-loaded F-MNPs were 200  $\mu\text{g}/\text{mL}$ . The control is untreated bFGF group (negative control).
